# Supplementary material for: B-24 協力課題における自己認知の実験的分析
Source: Royal Society of Chemistry journal article supplement (doi:10.1039/c4cp03779k), 2012-10-04
Supplement: c4cp03779k1.pdf [file c4cp03779k1.pdf]

**Table 1** Table S1 - Parameters found by QM calculations for the electrostatic term (Adenosine)

| Atom | Charge  |
|------|---------|
| CT5  | 0.1070  |
| CT4  | -0.1540 |
| OS1  | 0.1884  |
| CT3  | -0.1800 |
| OH1  | 0.2754  |
| CT2  | -0.1749 |
| OH2  | 0.2746  |
| CT1  | -0.1308 |
| N9   | 0.0936  |
| C2   | -0.0372 |
| NB   | 0.0910  |
| CB   | -0.1779 |
| CA   | -0.2025 |
| N2   | 0.3345  |
| NC   | 0.0737  |
| CQ   | -0.1051 |
| NC   | 0.1041  |
| CB   | -0.1622 |
| H11  | 0.0029  |
| H12  | 0.0021  |
| H13  | -0.0051 |
| H14  | 0.0198  |
| H15  | 0.0219  |
| H16  | 0.0242  |
| HO2  | -0.1818 |
| H2   | 0.0218  |
| H5   | 0.0189  |
| HH1  | -0.0056 |
| HH2  | -0.0185 |
| H5   | 0.0210  |
| HO1  | -0.1394 |

<sup>a</sup> Values set in (*e*).

---

**Table 2** Table S2 - Parameters found by quantum calculations for the electrostatic term (Guanosine)

| Atom | Charge  |
|------|---------|
| CT5  | 0.1167  |
| CT4  | 0.2623  |
| OS1  | -0.6018 |
| CT3  | 0.1919  |
| OH1  | -0.6103 |
| CT2  | 0.2545  |
| OH2  | -0.6799 |
| CT1  | 0.5347  |
| N9   | -0.4770 |
| CK   | 0.4080  |
| NB   | -0.5695 |
| CB2  | 0.0823  |
| C6   | 0.6851  |
| OO   | -0.4786 |
| NA   | -0.4684 |
| CA   | 0.8706  |
| NC   | -0.5345 |
| CB1  | 0.3092  |
| H11  | 0.0355  |
| H12  | 0.0085  |
| H13  | 0.0179  |
| H14  | 0.0288  |
| H15  | 0.0442  |
| H16  | -0.0080 |
| HO2  | 0.3217  |
| H2   | -0.0005 |
| H5   | -0.0548 |
| N2   | -0.6042 |
| HO1  | 0.3151  |
| HH1  | 0.1907  |
| HH2  | 0.2065  |
| HH3  | 0.2031  |

<sup>a</sup> Values set in (*e*).

---

**Table 3** Table S3 - Parameters found by quantum calculations for the electrostatic term (Cytidine)

| Atom | Charge  |
|------|---------|
| CT5  | 0.1760  |
| CT4  | 0.0741  |
| OS1  | -0.6852 |
| CT3  | 0.3906  |
| OH1  | -0.6733 |
| CT2  | 0.3395  |
| OH2  | -0.7518 |
| CT1  | 0.4810  |
| N9   | -0.6135 |
| C6   | 0.7328  |
| OO   | -0.5651 |
| NC   | -0.6031 |
| CA   | 0.9115  |
| N2   | -0.6180 |
| CM   | -0.6013 |
| C1   | 0.7661  |
| H11  | 0.0048  |
| H12  | 0.0379  |
| H13  | 0.0284  |
| H14  | 0.0259  |
| H15  | 0.0082  |
| H16  | 0.0111  |
| HO2  | 0.3383  |
| HO1  | 0.3903  |
| H2   | 0.0406  |
| HA   | -0.0877 |
| H4   | 0.0159  |
| HH1  | 0.2188  |
| HH2  | 0.2069  |

<sup>a</sup> Values set in (*e*).

---

**Table 4** Table S4 - Parameters found by quantum calculations for the electrostatic term (Uridine)

| Atom | Charge  |
|------|---------|
| CT5  | 0.1405  |
| H12  | 0.0145  |
| H13  | 0.0435  |
| CT4  | 0.1793  |
| H14  | 0.0165  |
| OS   | -0.641  |
| CT1  | 0.6526  |
| H2   | 0.0024  |
| CT3  | 0.4826  |
| H15  | 0.0310  |
| CT2  | 0.0874  |
| H16  | -0.0002 |
| OH2  | -0.7209 |
| HO2  | 0.3327  |
| N9   | -0.685  |
| CC1  | 0.7428  |
| NA   | -0.451  |
| CC2  | 1.0673  |
| CM1  | -0.5025 |
| CM2  | 0.4332  |
| OO1  | -0.529  |
| HH   | 0.2065  |
| OO2  | -0.5428 |
| HA   | -0.0699 |
| H4   | 0.0182  |

<sup>a</sup> Values set in (*e*).
